# Supplementary material
Source: PubMed Central journal article supplement (PMC9198019)
Supplement: 41467_2022_31132_MOESM1_ESM.pdf [file 41467_2022_31132_MOESM1_ESM.pdf]

**CXCL4 synergizes with TLR8 for TBK1-IRF5 activation, epigenomic remodeling and inflammatory response in human monocytes**

Chao Yang<sup>1</sup>, Mahesh Bachu<sup>1</sup>, Yong Du<sup>1</sup>, Caroline Brauner<sup>1</sup>, Ruoxi Yuan<sup>1</sup>, Marie Dominique Ah Kioon<sup>1</sup>, Giancarlo Chesi<sup>1</sup>, Franck J. Barrat<sup>1,2,3</sup>, Lionel B. Ivashkiv<sup>1,2,4\*</sup>

<sup>1</sup>HSS Research Institute and David Z. Rosensweig Genomics Research Center, Hospital for Special Surgery, New York, NY; <sup>2</sup>Immunology and Microbial Pathogenesis Program and <sup>3</sup>Department of Microbiology and Immunology and <sup>4</sup>Department of Medicine, Weill Cornell Medicine, New York, NY.

\* Correspondence: [IvashkivL@hss.edu](mailto:IvashkivL@hss.edu)

**Supplementary figures: 15**

**Supplementary table 1**

**Supplementary table 2**

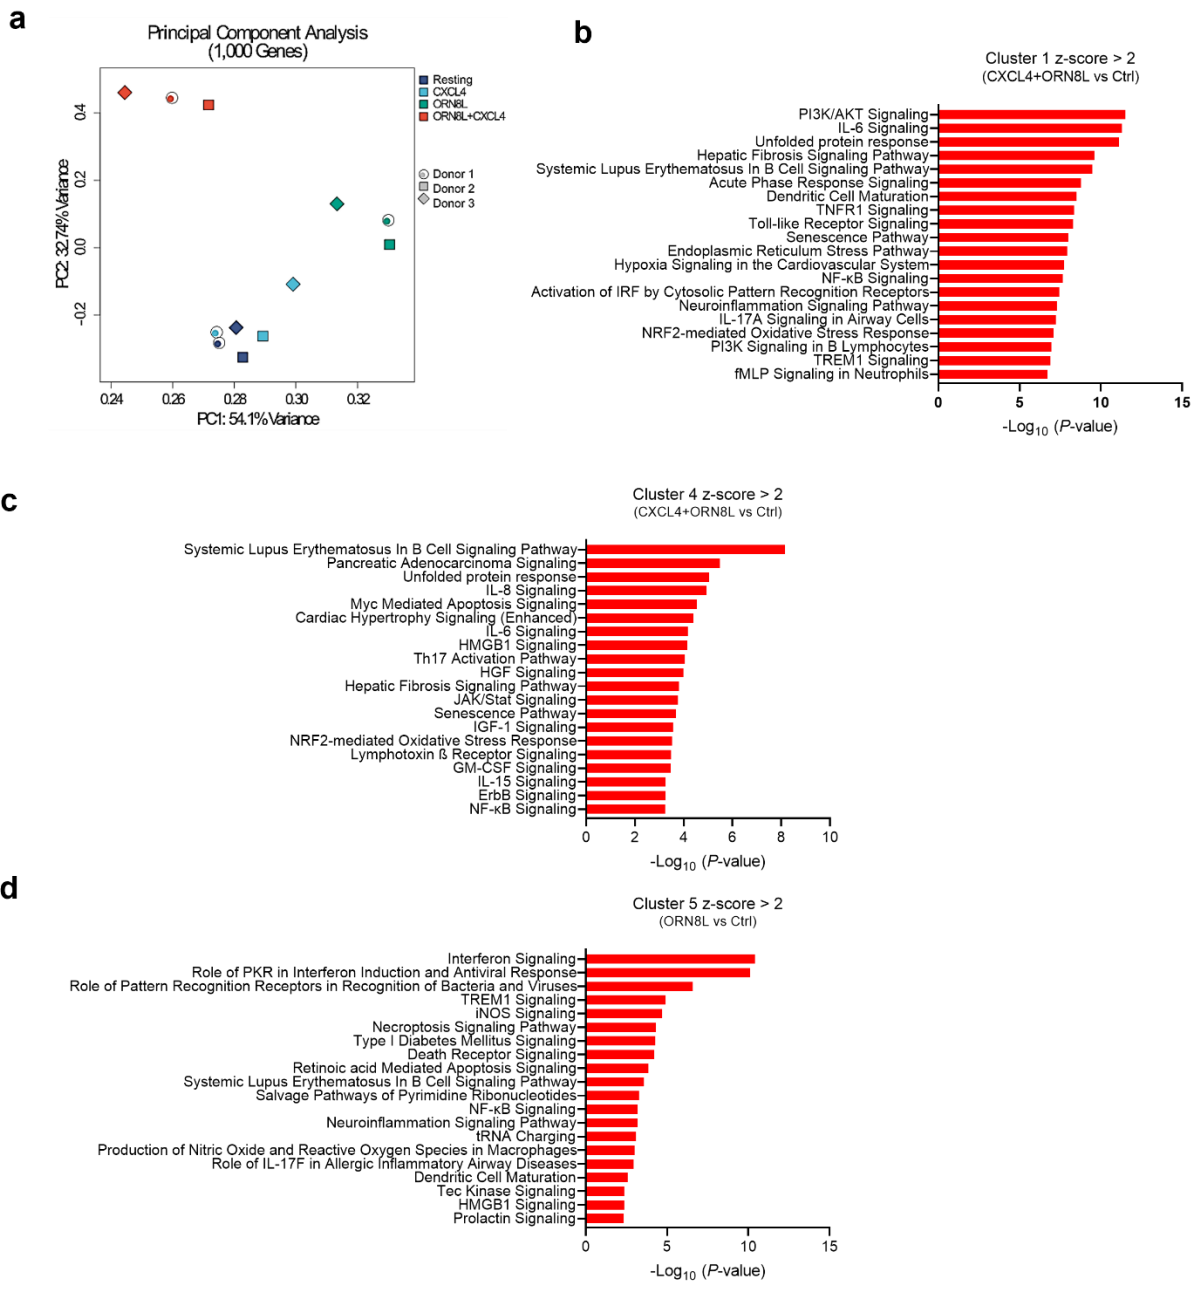

**Supplementary Figure 1.** (a) Principal Component Analysis (PCA) of RNAseq data. (b - d) IPA pathway analysis of gene clusters from **Figure 1a**. RNAseq was performed with three independent biological replicates.

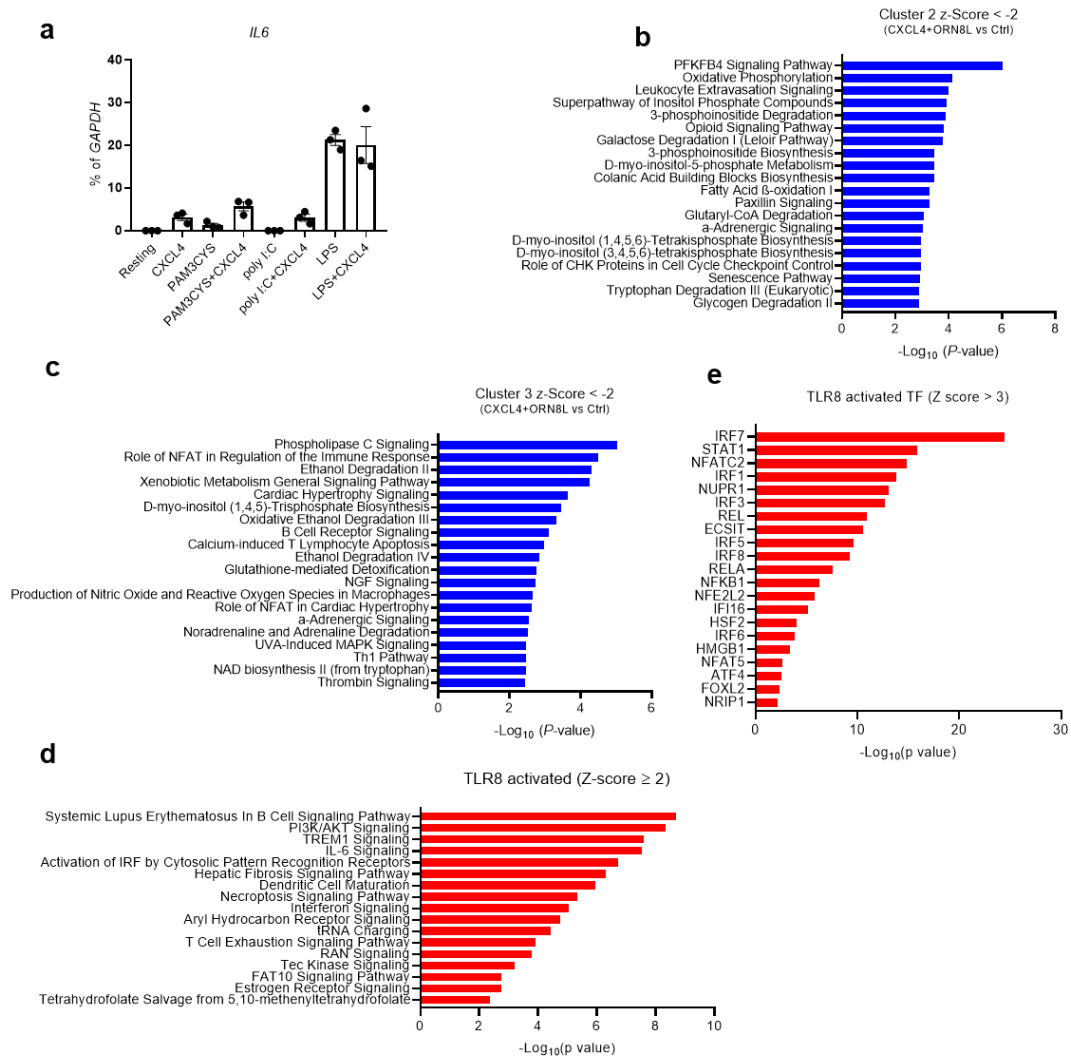

**Supplementary Figure 2.** (a) mRNA of *IL6* was measured by quantitative PCR (qPCR) and normalized relative to *GAPDH* mRNA.  $n = 3$  independent experiments. (b, c) IPA pathway analysis of gene clusters 2 and 3 from **Figure 1a**. (d, e) IPA pathway and TF analysis of genes upregulated by ORN8L from figure 1a. Data is depicted as mean  $\pm$  SEM for c. Source data are provided as a Source Data file.

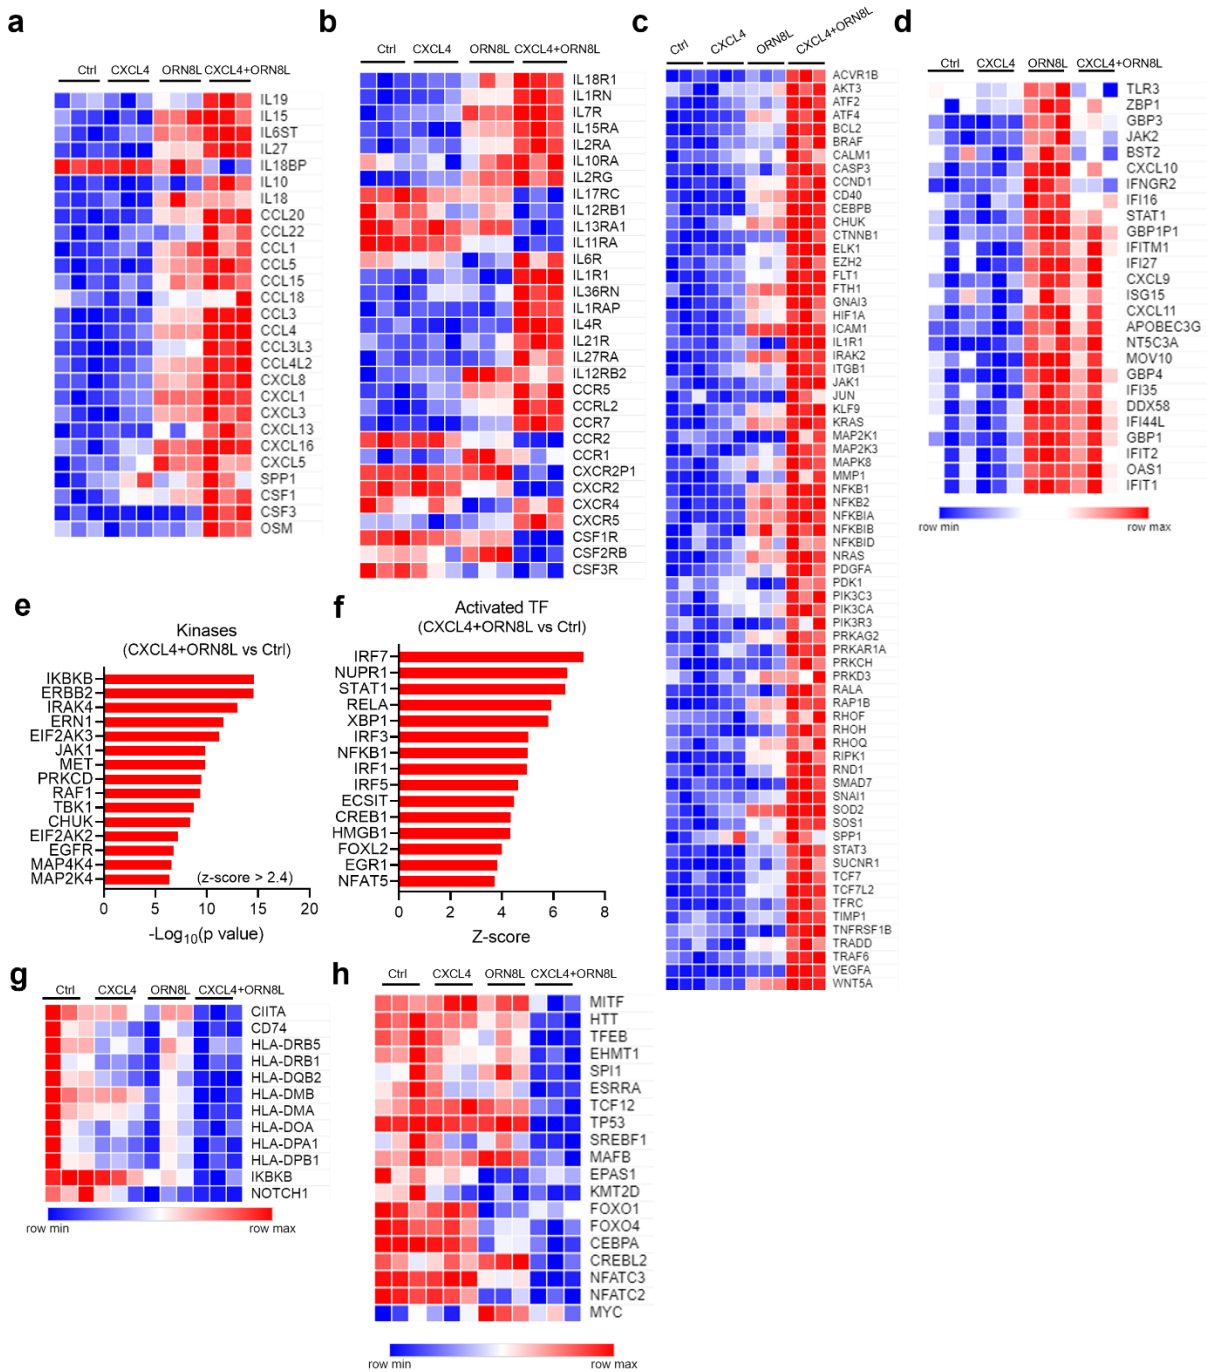

**Supplementary Figure 3.** (a - d, g, h) Heatmaps showing expression of representative cytokine and chemokine genes (a) and their receptors (b) and fibrosis related genes (c), and ISGs (d), and antigen presentation related genes (g) and transcription factors important for anabolic metabolism and osteoclastogenesis (h) assessed in experimental condition as in **Figure 1a** and presented (key) relative to the maximum. (e, f) IPA activated kinases and TF analysis of genes upregulated by CXCL4 + ORN8L from **figure 1a**.

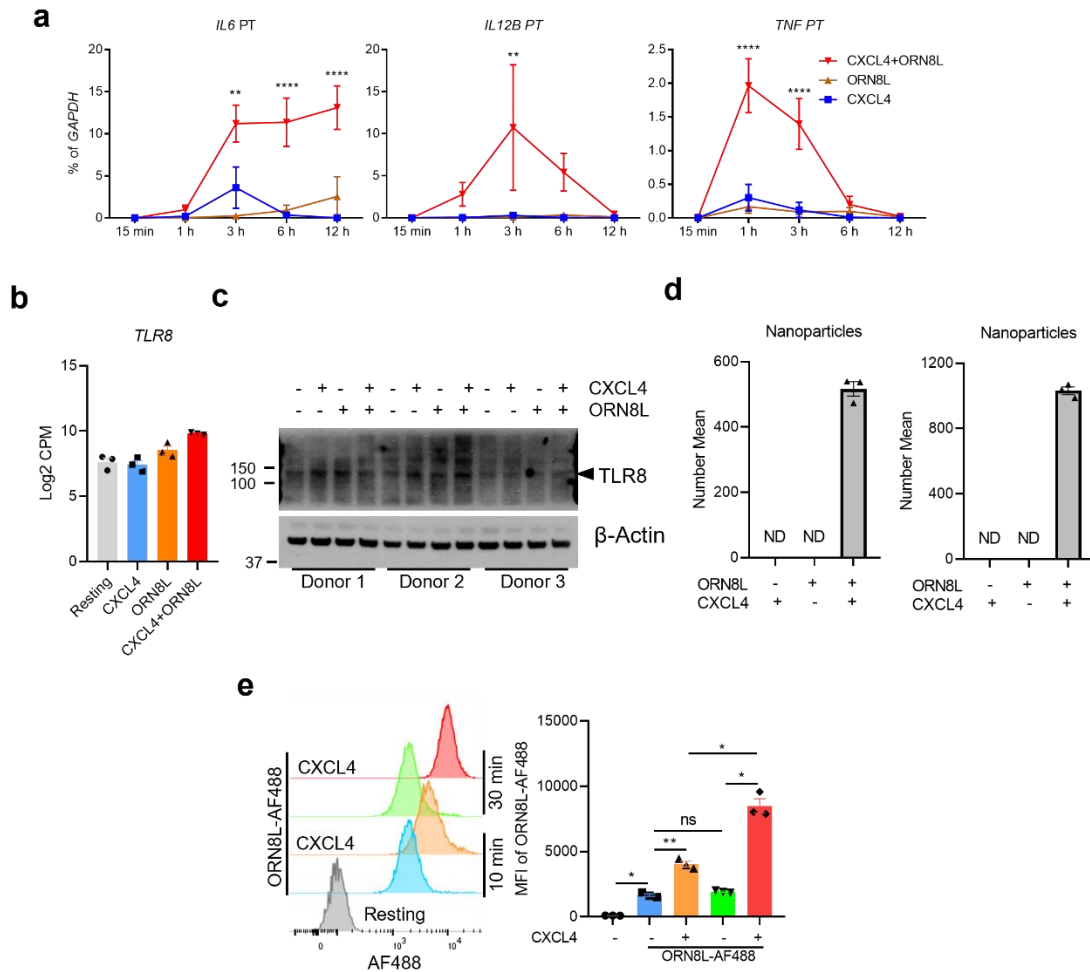

**Supplementary Figure 4.** (a) Primary transcripts (PT) of *IL6*, *IL12B* and *TNF* were measured by quantitative PCR (qPCR) and normalized relative to *GAPDH* mRNA (n = 4 donors). (b) Log<sub>2</sub> CPM of TLR8 from RNAseq data in human monocytes 6 hr after CXCL4 and/or ORN8L stimulation. (c) Immunoblots of TLR8 using whole cell lysates from the indicated conditions 6 hr after stimulation (data are representative of 3 independent experiments). (d) Nanoparticle formation measured using dynamic light scattering. The number mean is from one sample measured in triplicate. ND = not detected. 2 independent experiments are shown to supplement the third experiment shown in Fig. 1f. (e) Flow cytometric analysis of the internalization of ORN8L-AF488 after the indicated times of incubation in the absence or presence of CXCL4 in human monocytes. Left panel, representative FACS plot; right panel, cumulative data (n = 3 donors). Data is depicted as mean ± SEM; \*\*\*\*p ≤ 0.0001; \*\*\*p ≤ 0.001; \*\*p ≤ 0.01; \*p ≤ 0.05 by two-way ANOVA (a) or one-way ANOVA (e). Source data are provided as a Source Data file.

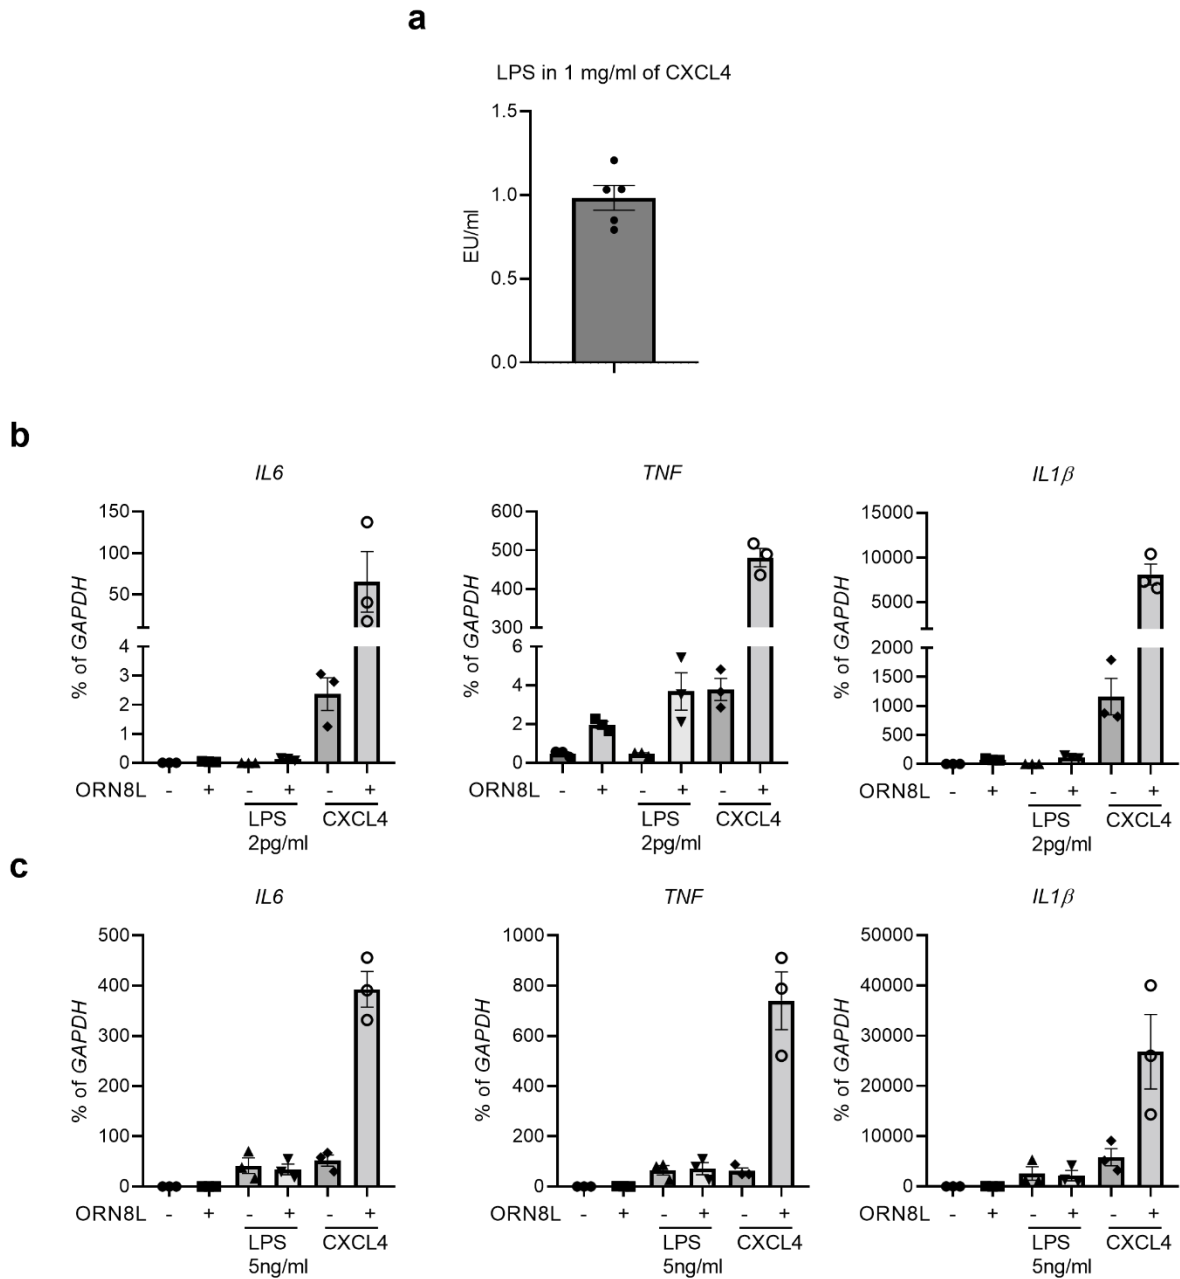

**Supplementary Figure 5.** (a) Endotoxin assay of CXCL4 stock solution (n = 5 technical replicates). (b and c) qPCR analysis of mRNA amounts of *IL6*, *TNF* and *IL1 $\beta$*  normalized relative to *GAPDH* mRNA in cells stimulated with 2 pg/ml LPS (n = 3 donors) (b) or 5 ng/ml LPS (n = 3 donors) (c) in the presence/absence of ORN8L, CXCL4 serves as a positive control. Data are depicted as mean  $\pm$  SEM. Source data are provided as a Source Data file.

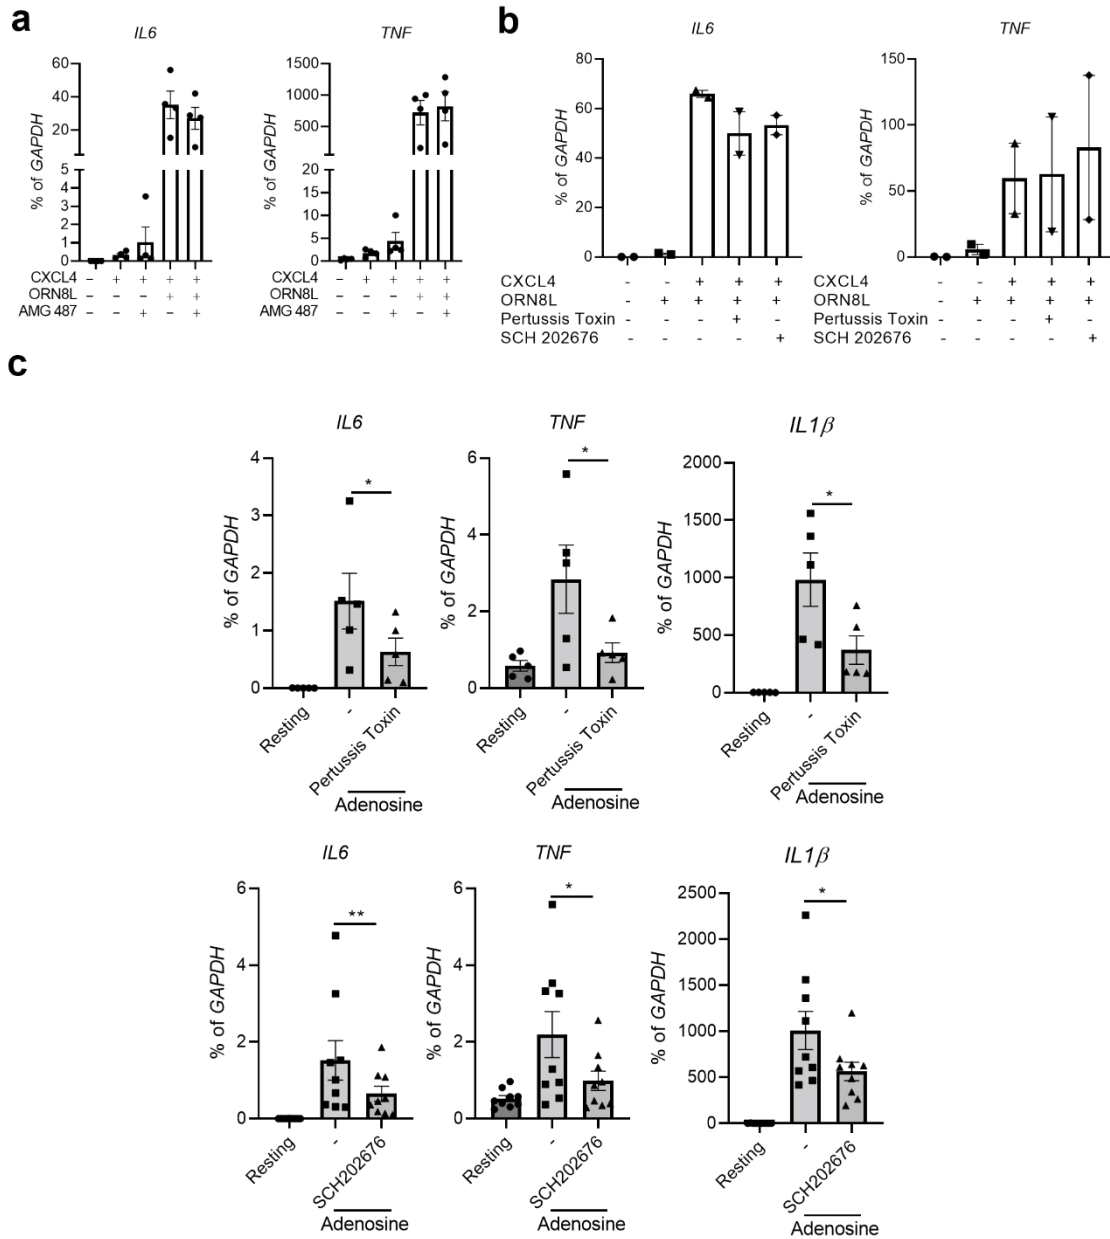

**Supplementary Figure 6.** (a) mRNA of *IL6* and *TNF* was measured by qPCR and normalized relative to *GAPDH* mRNA in cells stimulated with CXCL4 and/or ORN8L with/without CXCR3 inhibitor AMG487 (5  $\mu$ M) for 3 hr (n = 4 donors). (b and c) mRNA of *IL6* and *TNF* was measured by qPCR and normalized relative to *GAPDH* mRNA in cells stimulated with CXCL4 and/or ORN8L (b, n = 2 donors) or adenosine (1mM) (c, n = (upper panels) or 9 (lower panels)) with/without G-coupled receptor inhibitors Pertussis toxin (10  $\mu$ M) or SCH202675 (10  $\mu$ M) for 6 h. Data depict mean  $\pm$  SEM; \*\*p  $\leq$  0.01; \*p  $\leq$  0.05 by paired t test, Two-tailed (c). Source data are provided as a Source Data file.

**a**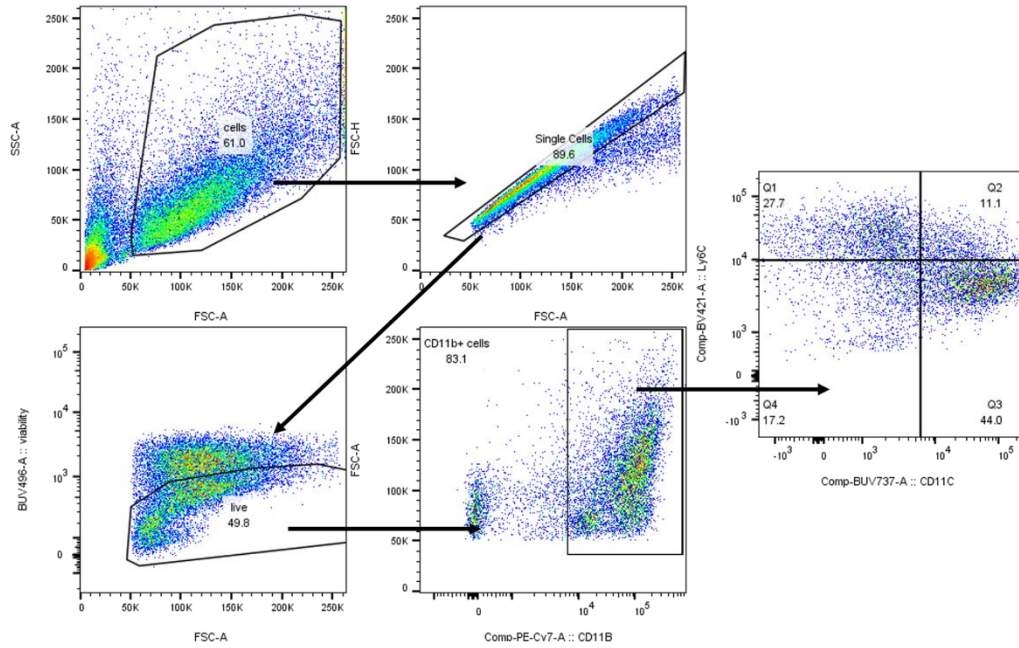**b**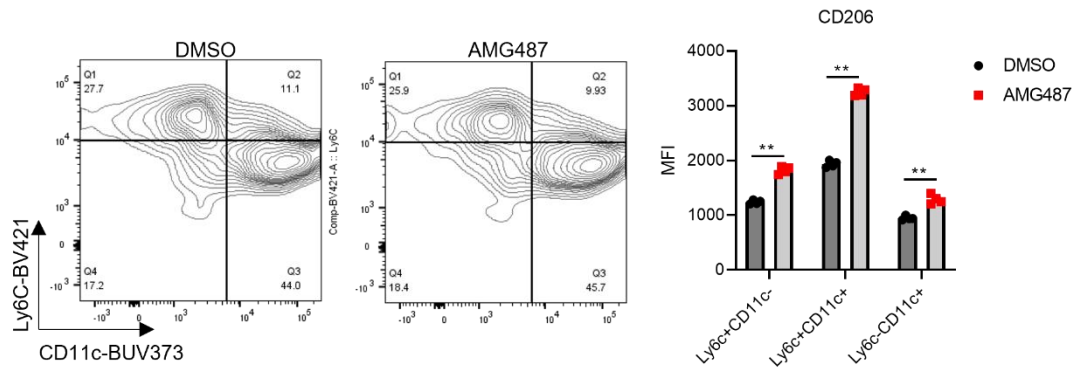

7

**Supplementary Figure 7.** (a) The gating strategy used for CD11b<sup>+</sup> cells and then separate the CD11b<sup>+</sup> cells into 4 different populations using CD11c and Ly6C markers. (b) FACS to analyze CD206 levels in Ly6C<sup>+</sup>CD11c<sup>-</sup>, Ly6C<sup>+</sup>CD11c<sup>+</sup> and Ly6C<sup>-</sup>CD11c<sup>+</sup> BMDCs with/without CXCR3 inhibitor AMG487 (5  $\mu$ M) for 24 hr (n = 4 independent experiment). Data depict mean  $\pm$  SEM; \*\*p  $\leq$  0.01 by two-way ANOVA (d). Source data are provided as a Source Data file.



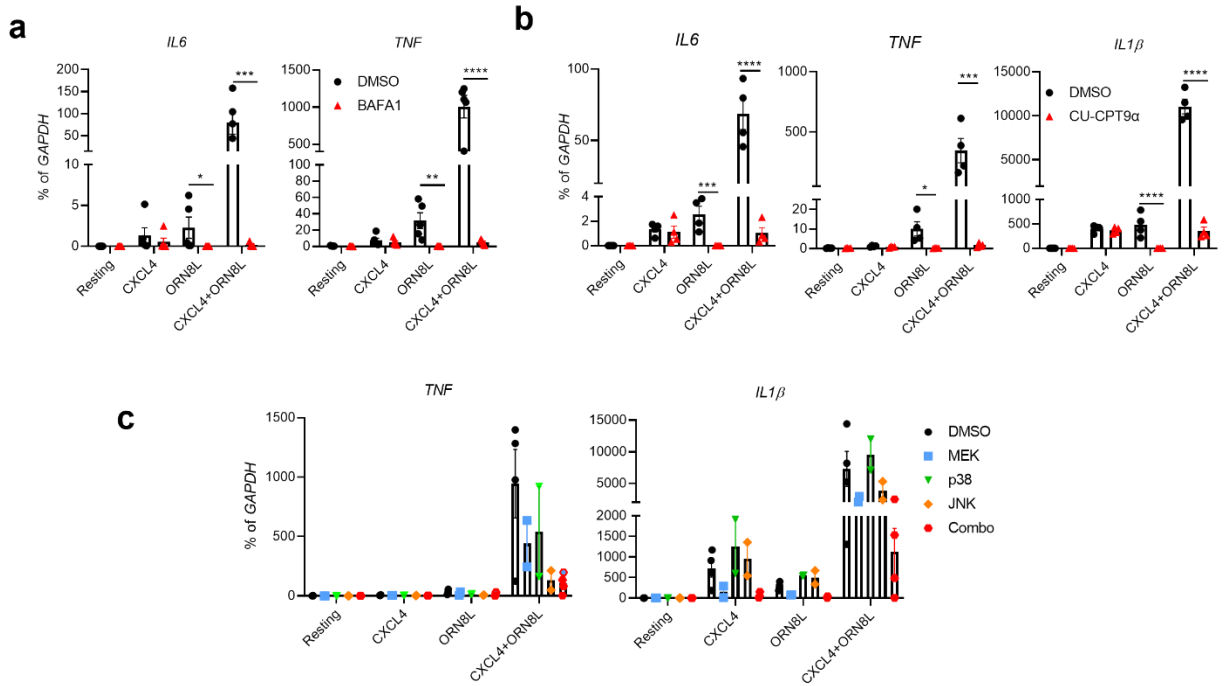

**Supplementary Figure 8.** (a and b) mRNA of *IL6*, *TNF* and *IL1β* was measured by qPCR and normalized relative to *GAPDH* mRNA in cells stimulated with CXCL4 and/or ORN8L with/without Bafilomycin A1 (BAFA1) (1  $\mu$ M) (n = 5 donors), TLR8 inhibitor CU-CPT9 $\alpha$  (1  $\mu$ M) (n = 4 donors) for 3 h, respectively. (c) qPCR analysis of mRNA amounts of *TNF* and *IL1β* normalized relative to *GAPDH* mRNA in cells stimulated with CXCL4 and/or ORN8L after treatment with the MAPK inhibitors SB 202190 (p38), JNK inhibitor II and U0126 (MEK1/2) used at 10  $\mu$ M, respectively (n = 4 donors). The data are related to and use some of the same samples as Fig. 2g. Data is depicted as mean  $\pm$  SEMdonors; \*\*\*\*p  $\leq$  0.0001; \*\*\*p  $\leq$  0.001; \*\*p  $\leq$  0.01; \*p  $\leq$  0.05 by two-way ANOVA. Source data are provided as a Source Data file.

**a**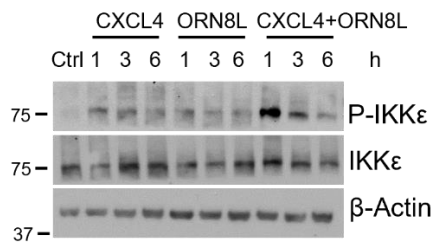**b**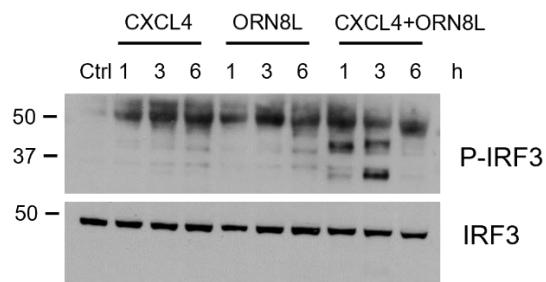**c**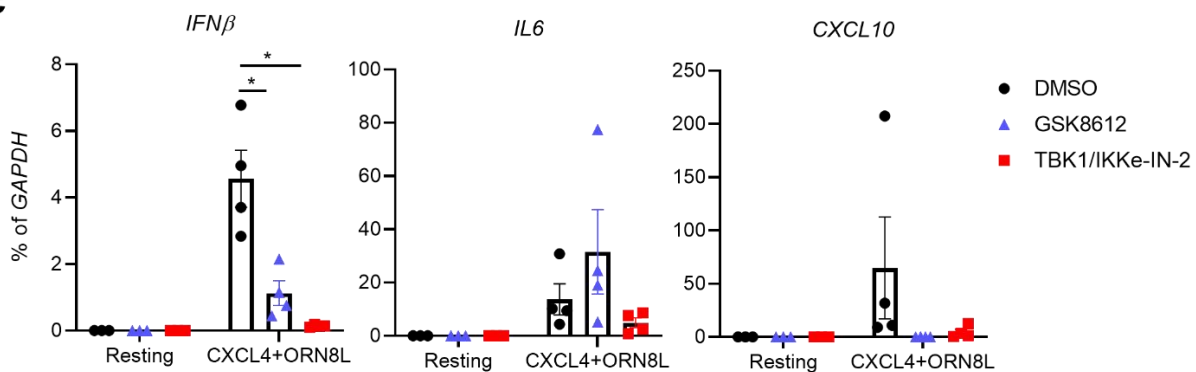**d**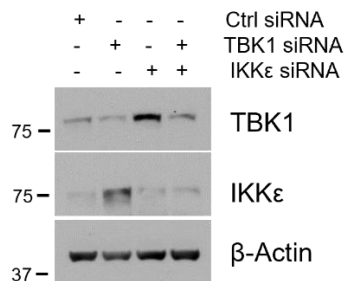**e**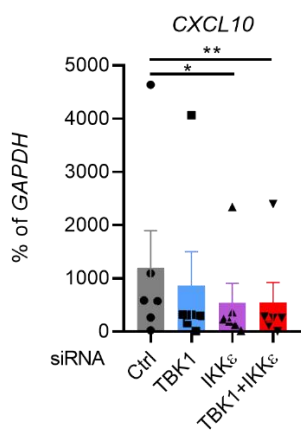**f**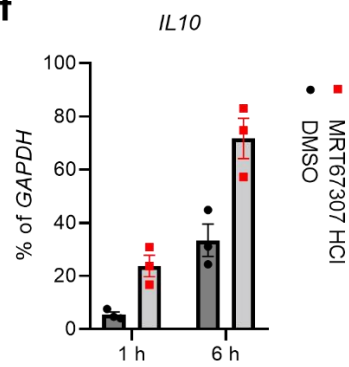**g**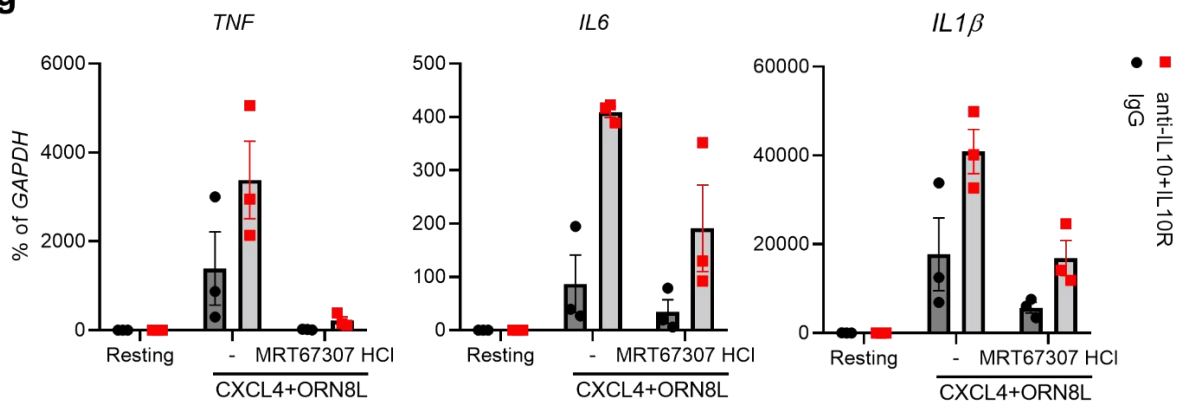

**Supplementary Figure 9.** (a and b) Immunoblots of phospho-IKK $\epsilon$ , total IKK $\epsilon$  (a) and phospho-IRF3 and total IRF3 (b) using whole cell lysates from a time course with the indicated conditions. (c) mRNA of indicated genes was measured by qPCR and normalized relative to *GAPDH* mRNA after blockade of TBK1/IKK $\epsilon$  activation by 1  $\mu$ M of TBK1/IKK $\epsilon$ -IN-2 or 50  $\mu$ M of GSK8612 (n = 4 independent experiments) for 3 h. (d) Immunoblot of TBK1 and IKK $\epsilon$  with whole cell lysates from monocytes nucleofected with control or TBK1- and/or IKK $\epsilon$ -specific siRNAs. (data representative of 3 independent experiments) (e) mRNA of *CXCL10* was measured by qPCR and normalized relative to *GAPDH* mRNA using monocytes nucleofected with control or TBK1- and/or IKK $\epsilon$ -specific siRNAs (n = 6 donors). (f) mRNA level of *IL10* measured by qPCR and normalized relative to *GAPDH* mRNA (n = 3 independent experiments). (g) mRNA of indicated genes was measured by qPCR and normalized relative to *GAPDH* mRNA after blockade of IL-10 and IL10R with/without TBK1 inhibitor MRT67307 HCl (n = 3 independent experiments). Data in (a and b) are representative of 3 experiments. Data are depicted as mean  $\pm$  SEM (c, e - g). \*\*p  $\leq$  0.01; \*p  $\leq$  0.05 by two-way ANOVA (c) or by Friedman test (e). Source data are provided as a Source Data file.

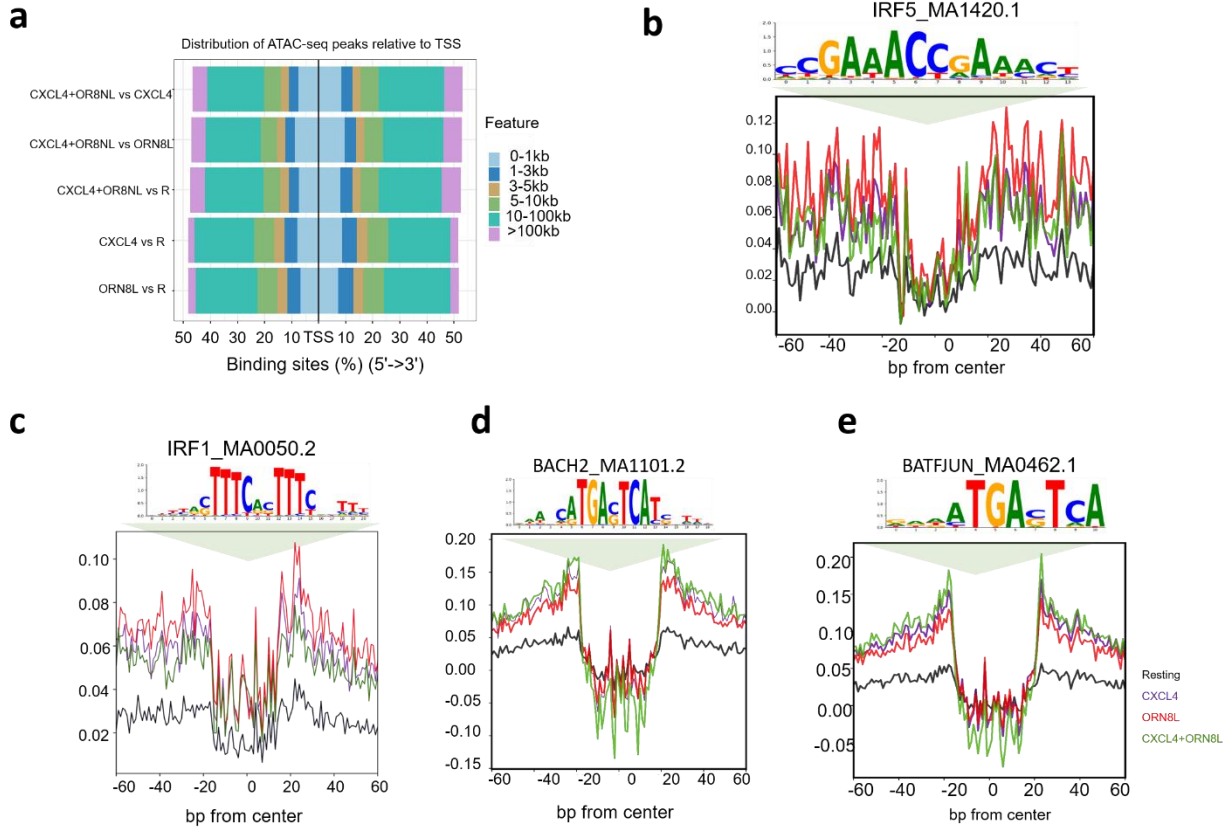

**Supplementary Figure 10.** (a) Chart representation of the relative distribution of ATAC-seq peak coordinates relative to the position of transcription start sites (TSS) for differential open chromatin regions identified by comparison of respective treatments versus the resting condition. (b - e) Visualization of significant footprints for all accessible sites for the following significant motifs IRF1\_MA0050.2, IRF5\_MA1420.1, BACH2\_MA1101.2, BATFJUN\_MA0462.1 that were identified by BINDetect using TOBIAS.



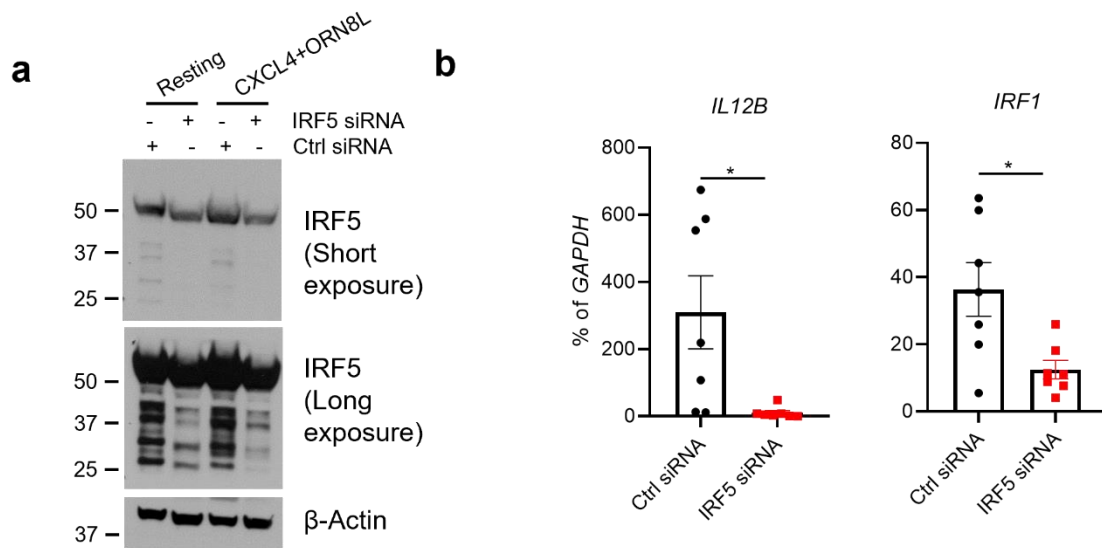

**Supplementary Figure 12. (a)** Immunoblot of IRF5 using whole cell lysates 3 days after nucleofection of monocytes with control or IRF5-specific siRNAs. **(b)** mRNA of indicated genes was measured by qPCR and normalized relative to *GAPDH* mRNA after knockdown of IRF5 by siRNA for 3 days ( $n = 7$  independent experiments). Data are representative of 3 independent experiments **(a)** or depict mean  $\pm$  SEM **(b)**. \* $p \leq 0.05$  by Wilcoxon signed-rank test, Two-tailed **(b)**. Source data are provided as a Source Data file.

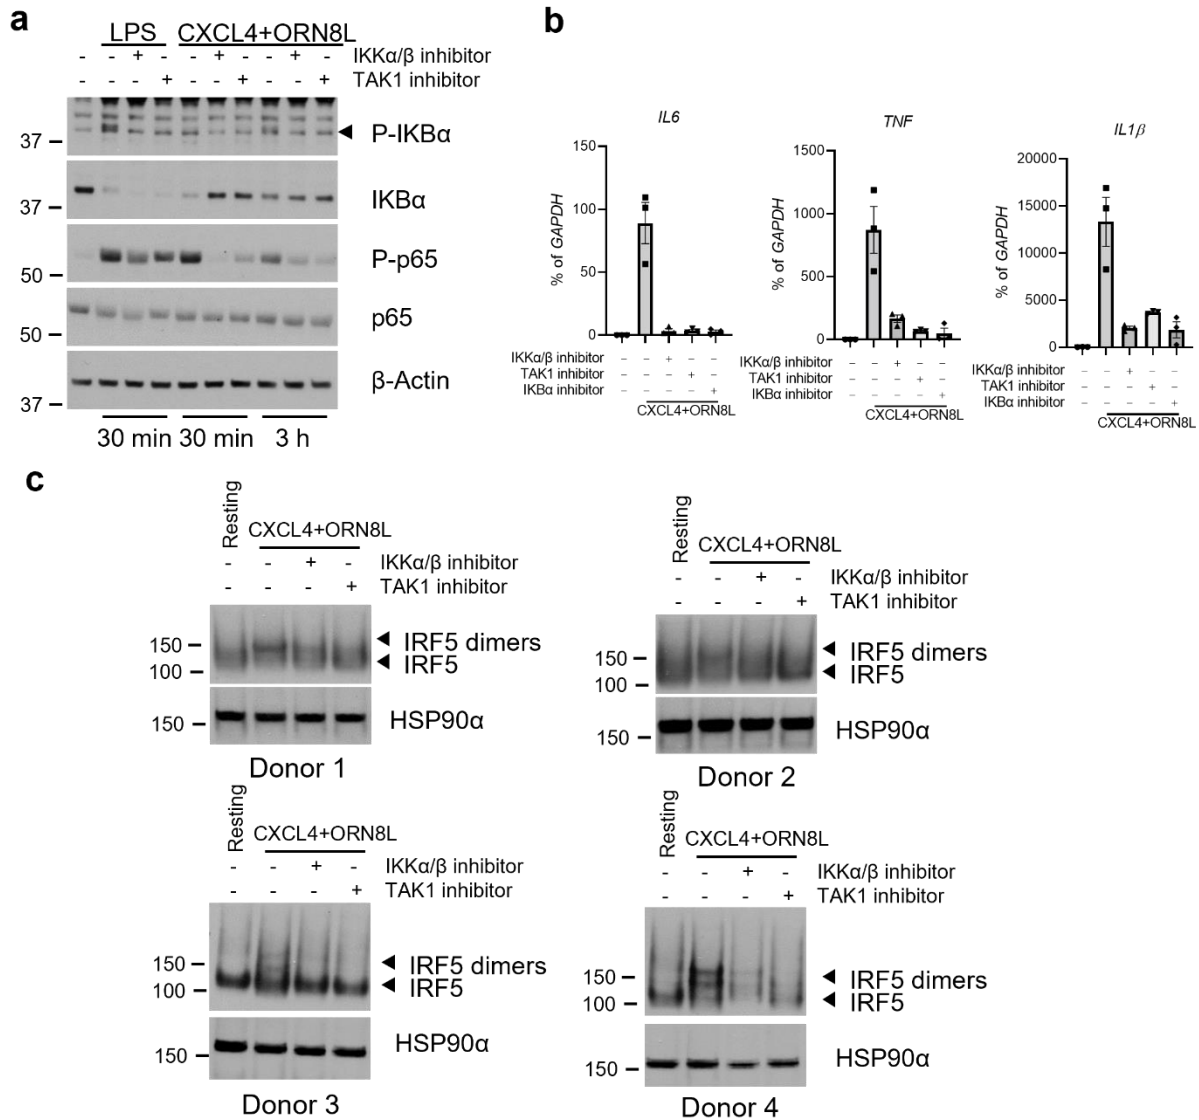

**Supplementary Figure 13.** (a) Immunoblots of phospho-IK $\beta$  $\alpha$ , total IK $\beta$  $\alpha$ , and phospho-p65 and total p65 using whole cell lysates from the indicated conditions (data representative of 4 independent experiments). (b) mRNA of *IL6*, *TNF* and *IL1 $\beta$*  was measured by qPCR and normalized relative to *GAPDH* mRNA in cells stimulated with CXCL4 and/or ORN8L and IKK $\alpha$ / $\beta$  inhibitor BMS-345541 (10  $\mu$ M), TAK1 inhibitor Takinib (10  $\mu$ M), and IK $\beta$  $\alpha$  inhibitor Bay 11-7085 (10  $\mu$ M), respectively (n = 3 donors). (c) Immunoblot of IRF5 using whole cell lysates with the indicated conditions run on nondenaturing gels. HSP90 $\alpha$  serves as loading control. Four independent experiments are shown. Data are depicted as mean  $\pm$  SEM for **b**. Source data are provided as a Source Data file.

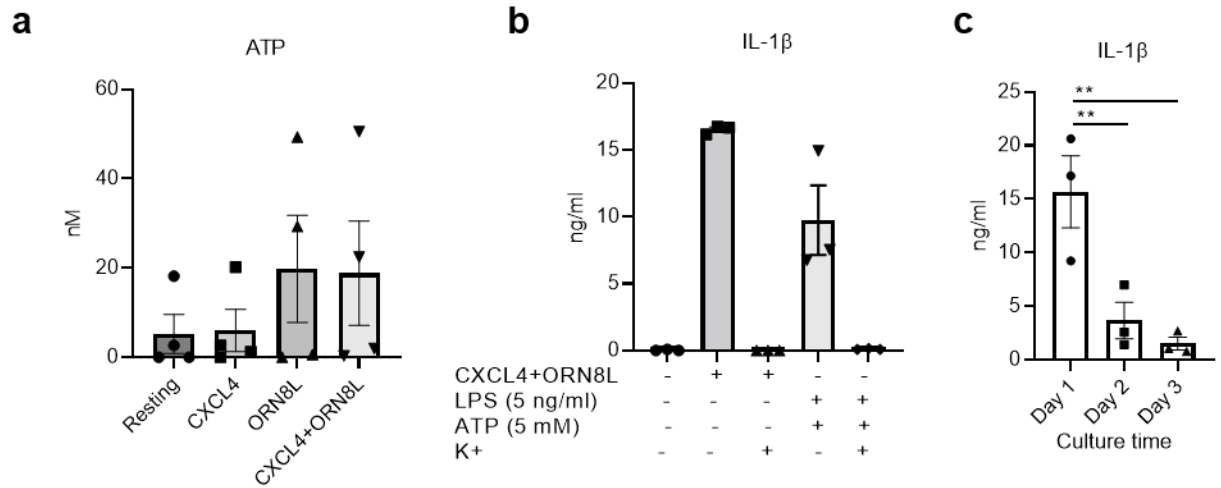

**Supplementary Figure 14.** (a) ATP concentration in indicated cell culture medium detected using ATP Determination Kit (n = 4 donors). (b) 130 mM extracellular concentration of K<sup>+</sup> suppressed (CXCL4 + ORN8L)-induced IL-1 $\beta$  secretion (n = 3 donors). (c) ELISA of IL-1 $\beta$  protein in culture supernatants of monocytes cultured in presence of M-CSF for 1-3 days prior to CXCL4 and TLR8 costimulation for 6h (n = 3 donors). Data is depicted as mean  $\pm$  SEM donors; \*\*p  $\leq$  0.01 by one-way ANOVA. Source data are provided as a Source Data file.



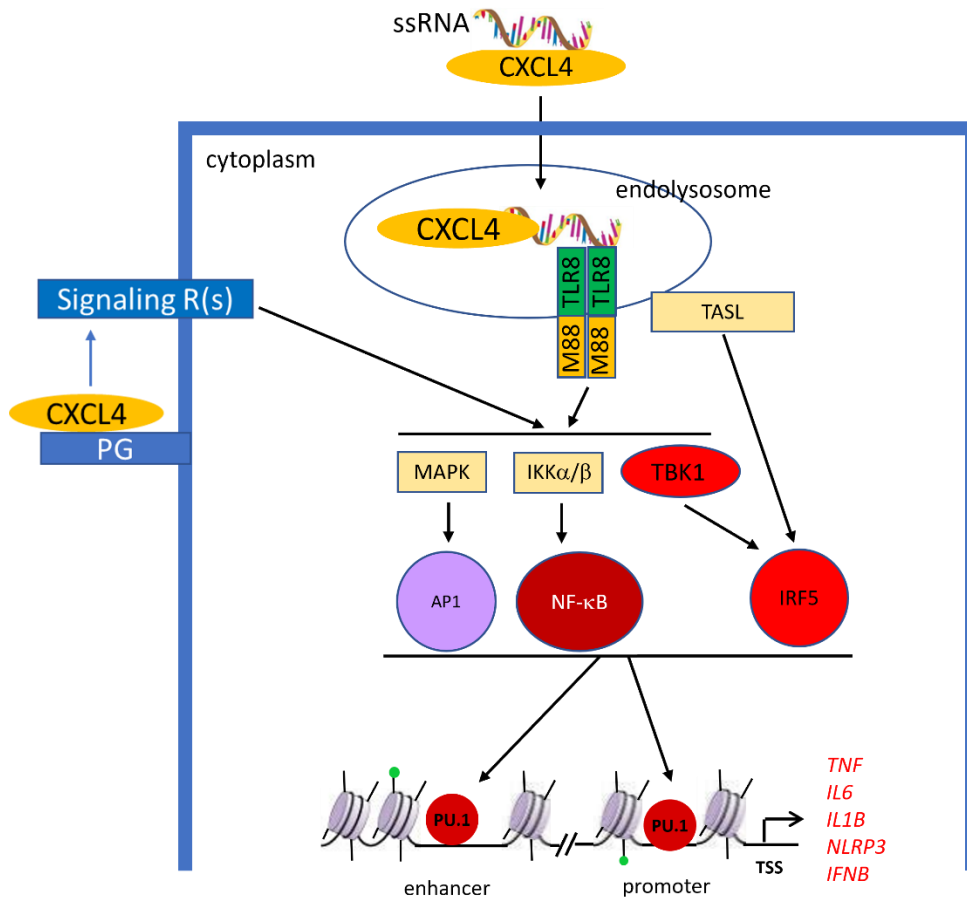

**Supplementary Figure 15.** A schematic model linking CXCL4 and TLR8 signaling with chromatin remodeling and de novo enhancers associated with inflammatory genes.

**Supplementary table 1: Primers and siRNAs.**

| <b>Primers for qPCR</b>                                                                               | <b>Source</b> |                  |
|-------------------------------------------------------------------------------------------------------|---------------|------------------|
| Human <i>GAPDH</i> F: ATCAAGAAGGTGGTGAAGCA;<br>R: GTCGCTGTTGAAGTCAGAGGA                               | This paper    |                  |
| Human <i>IL6</i> F: TAATGGGCATTCTTCTTCT; R:<br>TGCCTAACGCTCATACTTTT                                   | This paper    |                  |
| Human <i>IL12B</i> F: GGGCACAGATGCCCATTCGCT;<br>R: GGGCACAGATGCCCATTCGCT                              | This paper    |                  |
| Human <i>TNF</i> F: AATAGGCTGTTCCCATGTAGC; R:<br>AGAGGCTCAGCAATGAGTGA                                 | This paper    |                  |
| Human <i>IL6</i> primary transcript (PT) F:<br>TTGCAAGGAAGGTTTTTGGAG<br>R: CTTGGGTTTCAGTTCCAAGCTC     | This paper    |                  |
| Human <i>IL12B</i> primary transcript (PT) F:<br>AAGCACTTTGGAGGAAGCATAG; R:<br>TGAACCCAAGTCAATGTGAGTC | This paper    |                  |
| Human <i>TNF</i> primary transcript (PT) F:<br>TAAGGGTGACTCCCTCGATGT; R:<br>CCAAACCCAAACCCAGAATTA     | This paper    |                  |
| Human <i>IL1β</i> F: TTCGACACATGGGATAACGAGG;<br>R: TTTTGTGCTGTGAGTCCCGGAG                             | This paper    |                  |
| Human <i>CXCL10</i> F:<br>TTAATCTTGTCTCTGGGCTTGG; R:<br>GTTGGGGAATGAGGTTAGGG                          | This paper    |                  |
| Human <i>IRF1</i> F: GCACTAAGCGAAAATTGCA; R:<br>GGGAGTTTTCTTACATTCA                                   | This paper    |                  |
| Human <i>NLRP3</i> F: GATCTTCGCTGCGATCAACAG;<br>R: CGTGCATTATCTGAACCCAC                               | This paper    |                  |
| Mouse <i>Gapdh</i> F: ATCAAGAAGGTGGTGAAGCA;<br>R: AGACAACCTGGTCCTCAGTGT                               | This paper    |                  |
| Mouse <i>Ii6</i> F: TGGCTAAGGACCAAGACCATCCAA;<br>R: AACGCACTAGGTTTGCCGAGTAGA                          | This paper    |                  |
| Mouse <i>Tnf</i> F: CCCTCACACTCAGATCATCTTCT;<br>R: GCTACGACGTGGGCTACAG                                | This paper    |                  |
| Mouse <i>Ii1β</i> F: AGCTTCCTTGTGCAAGTGTCT; R:<br>GACAGCCCAGGTCAAAGTT                                 | This paper    |                  |
| <b>FAIRE Primers for qPCR</b>                                                                         |               |                  |
| Human <i>IL6</i> (promoter) F:<br>ACCCTCACCTCCAACAAAG; R:<br>GCAGAATGAGCCTCAGACATC                    | This paper    |                  |
| Human <i>TNF</i> (promoter) F:<br>GCCCCAGGGACATATAAAGG; R:<br>GCCCCAGGGACATATAAAGG                    | This paper    |                  |
| Human <i>IL12B</i> (promoter) F:<br>CCCAGAAGGTTTTGAGAGTTGT; R:<br>GATGTTGTTTCTTCTGCTGCTG              | This paper    |                  |
| <b>Oligonucleotides</b>                                                                               | <b>Source</b> | <b>CAS#</b>      |
| siGENOME Human TBK1 siRNA                                                                             | Horizon       | M-003788-02-0005 |
| siGENOME Human IKBKE siRNA                                                                            | Horizon       | M-003723-02-0005 |
| siGENOME Human IRF5 siRNA                                                                             | Horizon       | M-011706-00-0005 |
| ON-TARGETplus Human MYD88 siRNA                                                                       | Horizon       | L-004769-00-0005 |

**Supplementary table 2: Antibodies and Others.**

| <b>Antibodies</b>                                                                      | <b>Source</b>             | <b>CAS#</b> |
|----------------------------------------------------------------------------------------|---------------------------|-------------|
| IκBα (1:1000)                                                                          | Cell Signaling Technology | 9242s       |
| Phospho-p38 MAPK (Thr180/Tyr182) (3D7) (1:1000)                                        | Cell Signaling Technology | 9215S       |
| anit-p38 (1:1000)                                                                      | Cell Signaling Technology | 9212S       |
| Phospho-p44/42 MAP Kinase (ERK1/2) (1:1000)                                            | Cell Signaling Technology | 9101S       |
| ERK1/2 (1:1000)                                                                        | Cell Signaling Technology | 9102S       |
| TLR8 Polyclonal Antibody (1:500)                                                       | Thermofisher Scientific   | PA5-80137   |
| TBK1/NAK (E8I3G) (1:1000)                                                              | Cell Signaling Technology | 38066S      |
| Phospho-TBK1/NAK (Ser172) (D52C2) (1:1000)                                             | Cell Signaling Technology | 5483T       |
| Phospho-IKKε (Ser172) (D1B7) (1:500)                                                   | Cell Signaling Technology | 8766S       |
| IKKε (1:500)                                                                           | Cell Signaling Technology | 2690T       |
| NF-κB p65 (D14E12) (1:1000)                                                            | Cell Signaling Technology | 8242S       |
| Phospho-NF-κB p65 (Ser536) (93H1) (WB 1:1000; FC 1:1600)                               | Cell Signaling Technology | 3033S       |
| Goat anti-Rabbit IgG (H+L) Cross-Adsorbed Secondary Antibody, Alexa Fluor 594 (1:2000) | Thermofisher Scientific   | A-11012     |
| Phospho-IκBα (Ser32/36) (5A5) (1:1000)                                                 | Cell Signaling Technology | 9246S       |
| IκBα (1:1000)                                                                          | Cell Signaling Technology | 9242S       |
| Phospho-IRF-3 (Ser396) (D6O1M)(1:1000)                                                 | Cell Signaling Technology | 29047S      |
| IRF-3 (D6I4C) (1:1000)                                                                 | Cell Signaling Technology | 11904T      |
| IRF5 Polyclonal Antibody (1:1000)                                                      | Invitrogen                | PA5-19504   |
| β-Actin (D6A8) Rabbit mAb (1:5000)                                                     | Cell Signaling Technology | 8457        |
| NLRP3 (D4D8T) Rabbit mAb (1:250)                                                       | Cell Signaling Technology | 15101       |
| Human IL-1 beta /IL-1F2 Antibody (2805R) (1 ug/ml)                                     | R&D Systems               | MAB601R-100 |
| Caspase-1 (D7F10) Rabbit mAb (1:250)                                                   | Cell Signaling Technology | 3866        |
| Cleaved Gasdermin D (Asp275) (E7H9G) (1:500)                                           | Cell Signaling Technology | 36425       |
| AIM2 (D5X7K) Rabbit mAb (1:500)                                                        | Cell Signaling Technology | 12948       |
| Human IL-1 beta /IL-1F2 Biotinylated Antibody (0.4 ug/ml)                              | R&D Systems               | BAF201      |
| PE Streptavidin (1:400)                                                                | Biologend                 | 405203      |
| Phospho-IRF-3 (Ser386) (E7J8G) XP® Rabbit mAb (Alexa Fluor® 488 Conjugate) (1:50)      | Cell Signaling Technology | 73981       |
| CD11c Hamster anti-Mouse, BUV737, Clone: N418 (1:200)                                  | BD Biosciences            | BDB749039   |
| Pacific Blue™ anti-mouse Ly-6C Antibody (HK1.4) (1:200)                                | Biologend                 | 128014      |
| PerCP/Cyanine5.5 anti-mouse CD206 (MMR) Antibody (C068C2) (1:100)                      | Biologend                 | 141716      |
| Human/Primate IL-6 Antibody (6708) (4 ug/ml)                                           | R&D Systems               | MAB206-SP   |
| Human/Primate IL-6 Biotinylated Antibody (0.4 ug/ml)                                   | R&D Systems               | BAF206      |
| Human TNF-alpha Antibody (28401) (4 ug/ml)                                             | R&D Systems               | MAB610-SP   |
| Human TNF-alpha Biotinylated Antibody (0.4 ug/ml)                                      | R&D Systems               | BAF210      |
| Human IL-10 R alpha Antibody (37607) (10 ug/ml)                                        | R&D Systems               | MAB274-100  |

|                                                         |                       |                    |
|---------------------------------------------------------|-----------------------|--------------------|
| Human IL-10 Antibody (23738) (10 ug/ml)                 | R&D Systems           | MAB217-100         |
| <b>TLR ligands, inhibitors and recombinant proteins</b> |                       |                    |
| Recombinant Human IL-1 beta/IL-1F2 Protein              | R&D Systems           | 201-LB-005         |
| LPS                                                     | Invivogen             | TLRL-3pelps        |
| PAM3CYS                                                 | Invivogen             | TLRL-PMS           |
| Poly I:C                                                | Invivogen             | TLRL-PIC           |
| ORN8L                                                   | Chemgenes Corporation | (Lan et al., 2007) |
| ORN8L-AF488                                             | Chemgenes Corporation |                    |
| Recombination Human CXCL4                               | PEPROTECH             | 300-16             |
| PF-4 (CXCL4) human                                      | Sigma-Aldrich         | SRP3142            |
| Recombinant Human IL-6                                  | Peprtech              | 200-06             |
| Recombinant Human TNF-alpha                             | Peprtech              | 300-01A            |
| Pertussis Toxin                                         | R&D Systems           | 3097/50U           |
| SCH 202676 hydrobromide                                 | R&D Systems           | 1400/10            |
| BMS-345541-IKK $\alpha$ / $\beta$ inhibitor             | Selleckchem           | S8044              |
| Bay 11-7085-IK $\beta$ inhibitor                        | Selleckchem           | S7352              |
| Takinib                                                 | Selleckchem           | S8663-5mg          |
| NLRP3 Inhibitor, MCC950                                 | Sigma Aldrich         | 5381200001         |
| Ac-YVAD-cmk, CASP1 inhibitor                            | Sigma Aldrich         | SML0429            |
| SB202190, Hydrochloride, p38 inhibitor                  | Calbiochem            | 559393             |
| Bafilomycin A1                                          | MCE                   | HY-100558          |
| MRT67307 HCl (dual IKK $\epsilon$ and TBK1 inhibitor)   | Selleckchem           | S7948              |
| TBK1/IKK $\epsilon$ -IN-2                               | MCE                   | HY-12453           |
| GSK8612-TBK1 inhibitor                                  | Selleckchem           | S8872              |
| AMG 487 CXCR3 antagonist                                | TOCRIS                | 4487               |
| JNK Inhibitor II                                        | Sigma Aldrich         | 420119             |
| U0126 MEK1/2 inhibitor                                  | Sigma Aldrich         | 662005             |
