# Supplementary material
Source: PubMed Central journal article supplement (PMC9198019)
Supplement: 41467_2022_31132_MOESM3_ESM.pdf [file 41467_2022_31132_MOESM3_ESM.pdf]

## Description of Additional Supplementary Files

**Supplementary Data 1.** Transcription factor binding identified by differential binding analysis of  $n = 1011$  JASPAR motifs by TOBIAS using BINDetect algorithm in the conditions of CXCL4, ORN8L and (CXCL4 + ORN8L) stimulation.

**Supplementary Data 2.** Transcription factor motifs identified by HOMER de novo motif analysis of C1-C7 peaks from **Figure 5b**.
